# Supplementary material for: New method to determine black carbon mass size distribution
Source: Copernicus journal article supplement (doi:10.5194/amt-2022-137), 2022-05-20
Supplement: Supplementary file 1 [file amt-2022-137-supplement.pdf]

## 2 **New method to determine black carbon mass size distribution**

3 Weilun Zhao<sup>1</sup>, Gang Zhao<sup>2</sup>, Ying Li<sup>3,4</sup>, Song Guo<sup>2</sup>, Nan Ma<sup>5</sup>, Lizi Tang<sup>2</sup>, Zirui Zhang<sup>2</sup>, Chunsheng Zhao<sup>1</sup>

4 <sup>1</sup>Department of Atmospheric and Oceanic Sciences, School of Physics, Peking University, Beijing 100871, China

5 <sup>2</sup>State Key Joint Laboratory of Environmental Simulation and Pollution Control, College of Environmental Sciences and  
6 Engineering, Peking University, Beijing 100871, China

7 <sup>3</sup>Department of Ocean Science and Engineering, Southern University of Science and Technology, Shenzhen 518055, China

8 <sup>4</sup>Southern Marine Science and Engineering Guangdong Laboratory, Guangzhou 511458, China

9 <sup>5</sup>Institute for Environmental and Climate Research, Jinan University, Guangzhou 511443, China

10 Correspondence to: Chunsheng Zhao ([zcs@pku.edu.cn](mailto:zcs@pku.edu.cn))

11

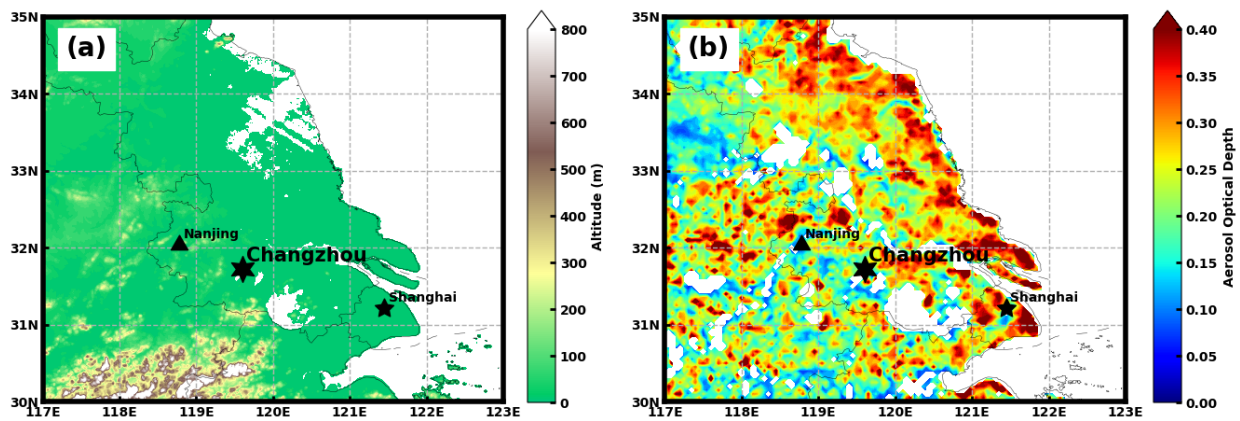

12

13 **Figure S1: Measurement site of Changzhou marked with hexagram. Shanghai and Nanjing was marked with pentagram**  
14 **and triangle for reference. Colored contours represent (a) the topography of the Yangtze River Delta, (b) the aerosol optical**  
15 **depth at 550 nm averaged over the period of the field measurement from Moderate Resolution Imaging Spectroradiometer**  
16 **onboard satellite Aqua.**

17

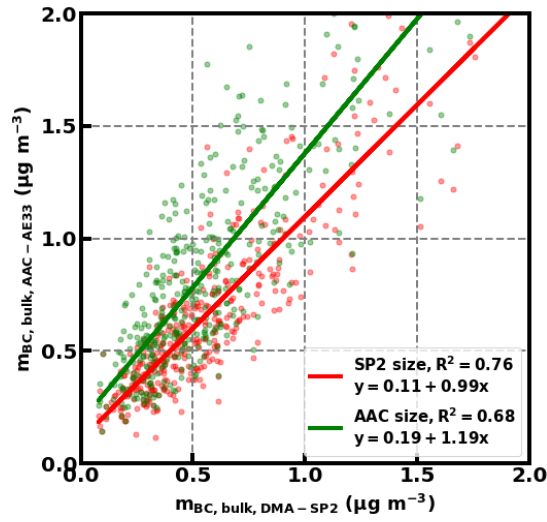

Figure S2: Comparison of  $m_{BC,bulk}$  integrated from  $BCMSD_{AAC-AE33}$  and  $BCMSD_{DMA-SP2}$ . Red (green) dots were  $m_{BC,bulk,AAC-AE33,part}$  ( $m_{BC,bulk,AAC-AE33}$ ) versus  $m_{BC,DMA-SP2}$  and the corresponding linear regression was presented by red (green) line, denoted as SP2 (AAC) size.

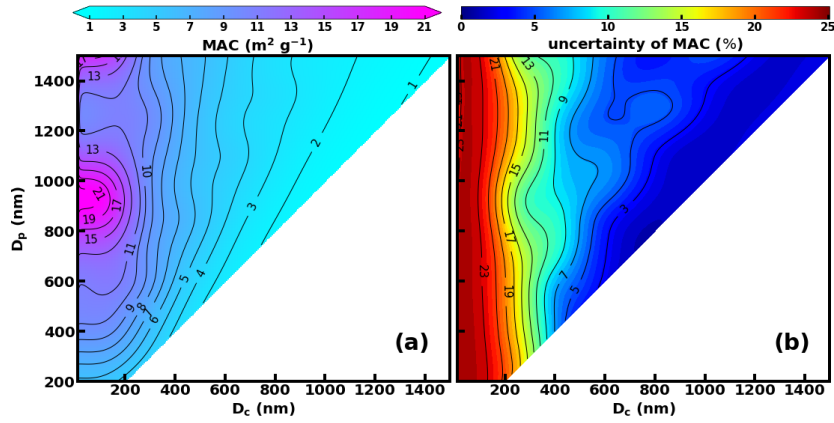

Figure S3: MAC lookup table (a) used in this study and the corresponding uncertainty caused by refractive index (RI) (b). The uncertainty was calculated by std of MAC divided by the mean MAC.

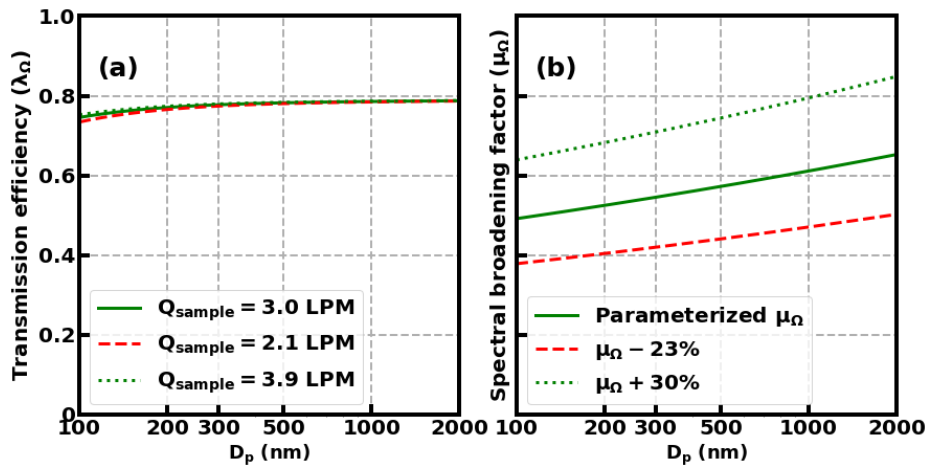

Figure S4: (a) The variation of  $\lambda_{\Omega}$  with respect to  $D_p$  and sample flow ( $Q_{sample}$ ).  $Q_{sample}$  used in this study was 3.0 L min<sup>-1</sup>

29 <sup>1</sup> (green line).  $Q_{\text{sample}}$  was varied from  $-30\%$  ( $2.9 \text{ L min}^{-1}$ , red dashed line) to  $+30\%$  ( $3.9 \text{ L min}^{-1}$ , green dotted line) for  
 30 uncertainty analysis. (b) The variation of  $\mu_{\Omega}$  with respect to  $D_p$  parameterized by Johnson et al. (2018) (green line).  $\mu_{\Omega}$   
 31 was varied from  $-23\%$  (red dashed line) to  $+30\%$  (green dotted line) for uncertainty analysis.

32

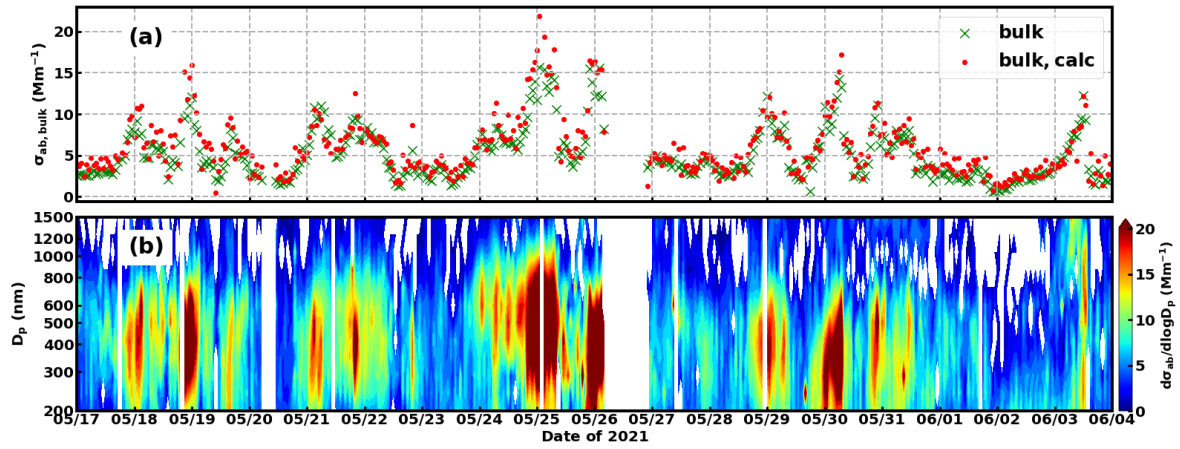

33

34

35

Figure S5: The time series of (a)  $\sigma_{ab, bulk}$  (green cross) and  $\sigma_{ab, bulk, calc}$  (red dot), (b)  $\sigma_{ab, size-resolved}$ .

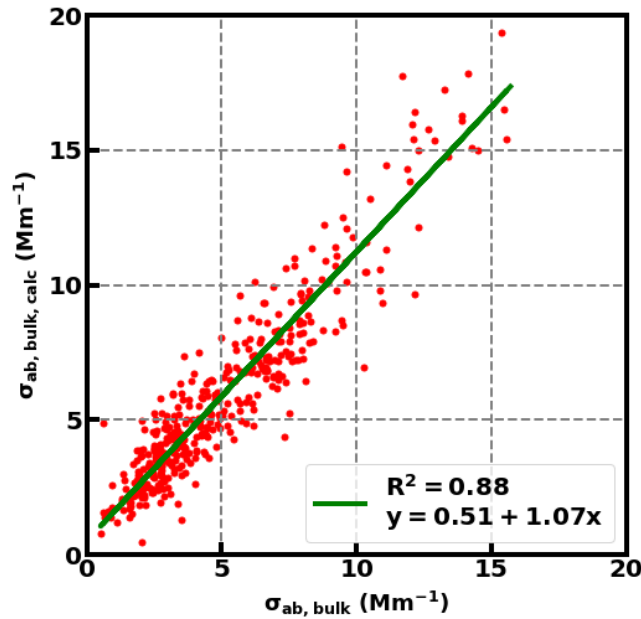

36

37

38

39

Figure S6: Comparison between  $\sigma_{ab, bulk, calc}$  and  $\sigma_{ab, bulk}$ . The red dots were data over the whole measurement period (Fig. S4a). The green line was the linear regression.

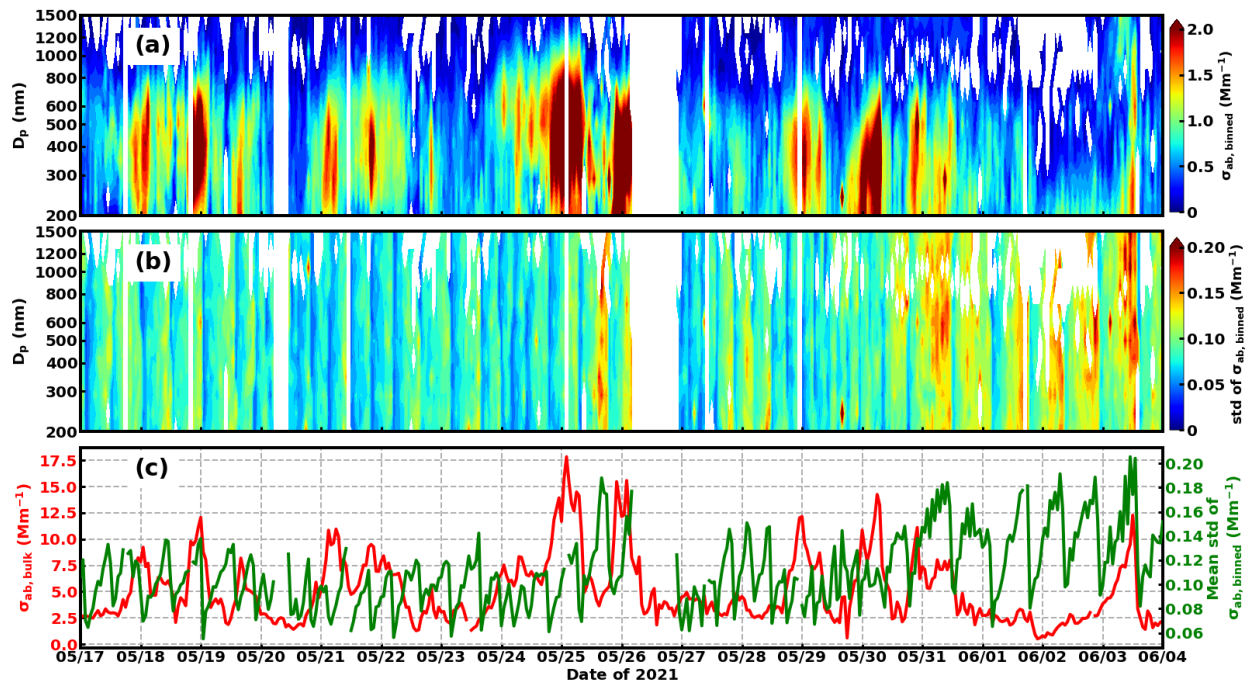

**Figure S7: The time series of (a)  $\sigma_{ab,binned}$ , (b) corresponding std of  $\sigma_{ab,binned}$ , (c)  $\sigma_{ab,bulk}$  (red line) and mean std of  $\sigma_{ab,binned}$  calculated with respect to  $D_p$  (green line).**

## References

Johnson, T. J., Irwin, M., Symonds, J. P. R., Olfert, J. S., and Boies, A. M.: Measuring aerosol size distributions with the aerodynamic aerosol classifier, *Aerosol Science and Technology*, 52, 655-665, 10.1080/02786826.2018.1440063, 2018.
